# Supplementary material for: Quantitative monitoring of the progress of organic reactions using multivariate image analysis-thin layer chromatography (MIA-TLC) method
Source: Royal Society of Chemistry journal article supplement (doi:10.1039/c2ay25023c), 2012-01-01

## Supplementary information for

### “Quantitative monitoring of the progress of organic reactions using multivariate image analysis-thin layer chromatography (MIA-TLC) method”

**Table S1** Calculation of conversion in percent using peak height as a signal

| Time (s) | PB <sup>a</sup> peak height | PB <sub>cor</sub> signal | IS <sup>b</sup> peak height | IS <sub>cor</sub> signal | PB <sub>cor</sub> /IS <sub>cor</sub> | Conversion (%) |
|----------|-----------------------------|--------------------------|-----------------------------|--------------------------|--------------------------------------|----------------|
| 0        | 5979.18                     | 5979.18                  | 2114.72                     | 2114.72                  | 2.83                                 | 0              |
| 89       | 1500.29                     | 2070.40                  | 1656.07                     | 2285.38                  | 0.91                                 | 67.96          |
| 186      | 1643.98                     | 2268.69                  | 1943.81                     | 2682.46                  | 0.85                                 | 70.09          |
| 286      | 1501.63                     | 2072.25                  | 2199.63                     | 3035.49                  | 0.68                                 | 75.86          |
| 404      | 1128.99                     | 1558.01                  | 2136.70                     | 2948.65                  | 0.53                                 | 81.31          |
| 540      | 758.12                      | 1046.21                  | 2042.92                     | 2819.23                  | 0.37                                 | 86.88          |
| 645      | 560.67                      | 773.72                   | 2083.93                     | 2875.82                  | 0.27                                 | 90.48          |
| 852      | 315.69                      | 435.65                   | 2172.70                     | 2998.33                  | 0.15                                 | 94.86          |
| 1041     | 290.62                      | 401.06                   | 3650.85                     | 5038.17                  | 0.08                                 | 97.18          |
| 1443     | 3.05                        | 4.21                     | 2322.01                     | 3204.37                  | 0.00                                 | 99.87          |

a Phenyl benzoate

b Internal standard: 4'-phenylacetophenone

**Table S2** Calculation of conversion in percent using peak area as a signal

| Time (s) | PB <sup>a</sup> peak area | PB <sub>cor</sub> signal | IS <sup>b</sup> peak height | IS <sub>cor</sub> signal | PB <sub>cor</sub> /IS <sub>cor</sub> | Conversion (%) |
|----------|---------------------------|--------------------------|-----------------------------|--------------------------|--------------------------------------|----------------|
| 0        | 266611.12                 | 266611.12                | 2114.72                     | 2114.72                  | 126.07                               | 0              |
| 89       | 46342.36                  | 63952.45                 | 1656.07                     | 2285.38                  | 27.98                                | 77.80          |
| 186      | 48423.97                  | 66825.07                 | 1943.81                     | 2682.46                  | 24.91                                | 80.24          |
| 286      | 42800.80                  | 59065.10                 | 2199.63                     | 3035.49                  | 19.46                                | 84.57          |
| 404      | 30346.31                  | 41877.90                 | 2136.70                     | 2948.65                  | 14.20                                | 88.73          |
| 540      | 20208.85                  | 27888.21                 | 2042.92                     | 2819.23                  | 9.89                                 | 92.15          |
| 645      | 14312.13                  | 19750.74                 | 2083.93                     | 2875.82                  | 6.87                                 | 94.55          |
| 852      | 8838.39                   | 12196.97                 | 2172.70                     | 2998.33                  | 4.07                                 | 96.77          |
| 1041     | 8128.60                   | 11217.46                 | 3650.85                     | 5038.17                  | 2.23                                 | 98.23          |
| 1443     | 165.67                    | 228.62                   | 2322.01                     | 3204.37                  | 0.07                                 | 99.94          |

a Phenyl benzoate

b Internal standard: 4'-phenylacetophenone

Fig S1

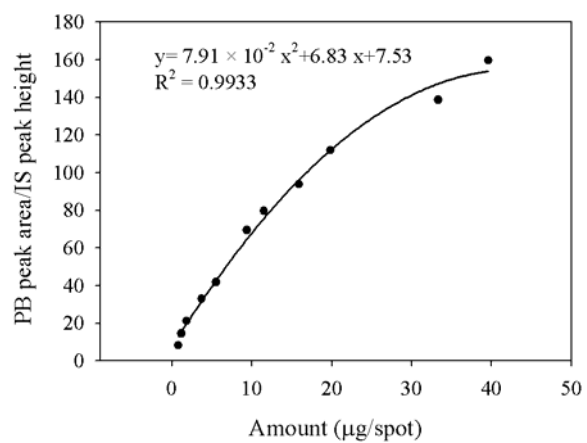

Supplement: c2ay25023c.pdf [file c2ay25023c.pdf]
